# Supplementary material
Source: publisher figshare collection journal article supplement (https://future-science-group.figshare.com/articles/dataset/_/22332799)
Supplement: Supplementary file 1 [file 1]

## Sheet: Sup Table 1
Supplementary Table 1. Optimized LC/MS methods used in the laboratories
Laboratory			A	B	C	D	E	F
Sample preparation			Immunoaffinity	Immunoaffinity	Immunoaffinity	Immunoaffinity	Immunoaffinity	Immunoaffinity
Conditions	IS concentration (ng/mL)		1.6	1.6	1.6	1.6	1.6	1.6
	Antibody/beads/sample		0.5 µg/50 µL/400 µL	0.5 µg/50 µL/400 µL	0.5 µg/50 µL/400 µL	0.5 µg/50 µL/400 µL	0.5 µg/50 µL/400 µL	0.5 µg/50 µL/400 µL
	Total reaction volume/sample		550 µL	550 µL	550 µL	550 µL	550 µL	550 µL
	Pre-incubation (antibody+beads) condition (temperature, time)		4 °C, overnight	5 °C, overnight	4 °C, overnight	4 °C, overnight	4 °C, overnight	4 °C, overnight
	Incubation (sample+prepared beads) condition (temperature, time)		4 °C, 2 h	5 °C, 2 h	4 °C, 2 h	4 °C, 2 h	4 °C, 2 h	4 °C, 2 h
	Washing buffer		0.05% Tween20 - PBS	0.05% Tween20 - PBS	0.05% Tween20 - PBS	0.05% Tween20 - PBS	0.05% Tween20 - PBS	0.05% Tween20 - PBS
	Elution solution		0.5% FA - 50% MeOH	0.5% FA - 50% MeOH	0.5% FA - 50% MeOH	0.5% FA - 50% MeOH	0.5% FA - 50% MeOH	0.5% FA - 50% MeOH
	Elution volume		75 µL	75 µL	50 µL*	60 µL	75 µL	75 µL (+ 425 µL)**
Liquid Chromatography			Ultimate3000 UHPLC (Thermo Fisher Scientific, Waltham, MA)	Nexera X2 system (Shimadzu, Kyoto, Japan)	Nexera X3 system (Shimadzu, Kyoto, Japan)	ACQUITY UPLC I-Class (Waters, Milfold, MA)	Easy nLC1000 (Thermo Fisher Scientific, Waltham, MA)	PAC - Nexra LC-40D (Shimadzu, Kyoto, Japan )
Conditions	Mobile phase A		H2O 0.1% FA	H2O 0.1% FA	H2O 0.1% FA	H2O 0.1% FA	10% ACN 0.1% FA	H2O/acetic acid (100/1, v/v)
	Mobile phase B		ACN 0.1% FA	ACN 0.1% FA	ACN 0.1% FA	ACN 0.1% FA	90% ACN 0.1% FA	H2O/MeOH/ACN/2Pro (3/2/2/2, v/v/v/v)
	Mobile phase C							Acetic acid
	Flow rate (μL/min)		400	400	400	400	0.3	600 (1200 for 10.1-20.9 min)
	Column		Triart Bio C18 (2.1 × 100 mm, 3 μm) (YMC, Kyoto, Japan)	Triart Bio C18 (2.1 × 100 mm, 3 μm) (YMC, Kyoto, Japan)	InertSustainBio C18 (2.1 x 100 mm, 1.9 μm) (GL Science, Tokyo, Japan)	Triart Bio C18 (2.1 × 100 mm, 3 μm) (YMC, Kyoto, Japan)	Analytical column: NANO HPLC CAPILLARY COLUMN (75 μm x 125 mm, 3 μm) (Nikkyo Technos, Tokyo, Japan) Pre-analytical column: PepMap100 C18 (75 μm x 20 mm, 3 μm) (Thermo Fisher Scientific, Waltham, MA)	IntertSustain AQ-C18 (2.1 × 50 mm, 5 μm) (GL Science, Tokyo, Japan)
	Column temperature (°C)		50	50	50	50	Room temperature	70
	Gradient program		30% B (0-1 min) - 40% B (7 min) - 95% B (7.1 min) - 95% B (7.1-10 min) - 30% B (10.1 min) - 30% B (10.1-10.5 min)	30% B (0-1 min) - 40% B (7 min) - 95% B (7.1 min) - 95% B (7.1-10 min) - 30% B (10.1 min) - 30% B (10.1-10.5 min)	30% B (0-1 min) - 40% B (7 min) - 95% B (7.1 min) - 95% B (7.1-10 min) - 30% B (10.1 min) - 30% B (10.1-10.5 min)	30% B (0-1 min) - 40% B (7 min) - 95% B (7.1 min) - 95% B (7.1-10 min) - 30% B (10.1 min) - 30% B (10.1-10.5 min)	5% B (0 min) - 30% B (10 min) - 55% B (14 min) -100% B (16 min) - 100% B (16-25 min)	35% BC(4/1):(0-1 min) -85% BC(4/6): (10 min) -100% BC(2/8): (10.1 min) -100% BC(2/8): (10.1-12 min) -10% BC(7/3): (12-12.1 min) -10% BC(7/3): (12.1-14 min) -100% BC(7/3): (14-16 min) -100% BC(7/3): (16-18 min) -35% BC(4/1): (18.1 min) -35% BC(4/1): (18.1-21 min)
	Autosampler temperature (°C)		5	10	10	8	7	15
	Injection volume (µL)		20	20	5	15	5	200 (sample volume: 500 μL)
	Sample container		Vial	Vial	Plate	Vial	Vial	Plate
Mass spectrometer			TSQ-Quantiva (Thermo Fisher Scientific, Waltham, MA)	QTRAP 6500 (Sciex, Framingham, MA)	QTRAP 7500 (Sciex, Framingham, MA)	TQ-XS (Waters, Milfold, MA)	Q exactive HF-X (Thermo Fisher Scientific, Waltham, MA)	Triple Quad 7500 (Sciex, Framingham, MA)
Parameters	Ionization mode		ESI	ESI	ESI	ESI	ESI	ESI
	Scan type		SRM	SRM	SRM	SRM	PRM	SRM
	Detection mode		Positive	Positive	Positive	Positive	Positve	Positive
	Ion source voltage (V)		4000	5500	2000	700	2000	4500
	Ion source gas (AU)		Sheath/Aux/Sweep: 40/25/0	GS1/GS2/CUR: 80/80/20	GS1/GS2/CUR/CAD: 30/50/40/8	50	0	GS1/GS2/CUR: 90/90/40
	Ion source temperature (°C)		Ion transfer tube: 350, Vaporizer: 225	500	350	150	Ion transfer tube: 250	500
	Collision energy (V)		GLP-1 : 14.5 IS: 16 inactive GLP-1: 20	GLP-1 : 23 IS: 23 inactive GLP-1: 26	GLP-1 : 10/24/47 IS: 10/23/31 inactive GLP-1:10/30/47	GLP-1 : 15 IS: 16 inactive GLP-1: 20	NCE 30	GLP-1 : 825.3/901.9 (39), 825.3/1030.7 (33), 825.3/1126.8 (39), 660.5/751.8 (23) IS: 827.9/904.5 (39), 827.9/1045.5 (33), 827.9/1132.6 (39), 662.5/755.6 (23) inactive: 773.3/852.2 (30), 773.3/885.9 (30)
	Collision gas type and pressure (AU)		Ar, 3	N2, 8	N2, 8	Ar, 7	N2	N2, 9
	Resolution		1.2 (Q1 and Q3)	unit (Q1 and Q3)	unit (Q1 and Q3)	LM Resolution 2.7 HM Resolution 14.7	MS2 Isolation Width m/z 2 Orbitrap analyzer 60,000 FWHM at m/z 200 Peak extraction mass tolerance 5 ppm	unit (Q1 and Q3)
	Transition	GLP-1	660.50/751.92	660.45/751.67	660.520/751.813	660.58/751.92	825.426/757.483, 828.520, 946.390	825.3/901.9, 825.3/1030.7, 825.3/1126.8, 660.5/751.8
		IS	662.47/755.64	662.85/755.8	662.920/755.640	662.47/755.64	828.436/763.503, 834.540, 946.390	827.9/904.5, 827.9/1045.5, 827.9/1132.6, 662.5/755.6
		inactive GLP-1	773.29/852.22	773.15/851.5	773.360/886.046	773.29/852.22	773.371/571.404, 757.483, 828.520	773.3/852.2, 773.3/885.9
Data analysis	Peak detection and area quantification	Software	TraceFinder	Analyst	SCIEX OS	MassLynx	Xcalibur	Sciex OS
		Smoothing	Done	Done	Done	Done	Avalon	Done
	Calibration	Software	GraphPad Prism	Analyst	SCIEX OS	TargetLynx	Xcalibur	Sciex OS
		Regression	Linear regression	Linear regression	Linear regression	Linear regression	Quadratic regression	Linear regression
		Weighting	1/x2 weighting	1/x2 weighting	1/x2 weighting	1/x2 weighting	1/x weighting	1/x2 weighting
Abbreviations:	IS, Internal standard; ACN, Acetonitrile; FA, Fomic acid; MeOH, methanol; 2Pro, 2-Propanol; PBS, Phosphate-buffered saline; ESI, Electrospray ionization; MRM, Multiple reaction monitoring; PRM, Parallel reaction monitoring; AU, Arbitrary unit
*:	50 µL of eluted solution was nitrogen dried and redissolved with 20 µL of elution solution
**:	Eluted with 75 µL followed by dilution with 425 µL

## Sheet: Sup Table 2 
Supplementary Table 2. Summary of evaluated parameters in each batch in each laboratory
Laboratory	A	B	C	D	E	F
Calibration curve	Batch 1-3	Batch 1-3	Batch 1-3	Batch 1-3	Batch 1	Batch 1-3
QC （Precision and relative accuracy)	Batch 1-3	Batch 1-3	Batch 1-3	Batch 1-3	Batch 1	Batch 1-3
Carryover	Batch 1-3	Batch 1-3	Batch 1-3	Batch 1-3	Batch 1	Batch 1-3
Blind sample analysis	Bacth 2, 3	Bacth 4	Batch 2	Batch 2	Batch 1	Batch 2, 3
Processed sample stability	Batch 2	Batch 2	Batch 2	Batch 1	Batch 2, 3	Batch 1
Parallelism	Bach 4	Bach 2	Batch 2	Batch 2	Batch 1	Batch 1
